# Supplementary material
Source: PubMed Central journal article supplement (PMC2580055)
Supplement: NIHMS59836-supplement-01.pdf [file NIHMS59836-supplement-01.pdf]

Supplemental Figures:

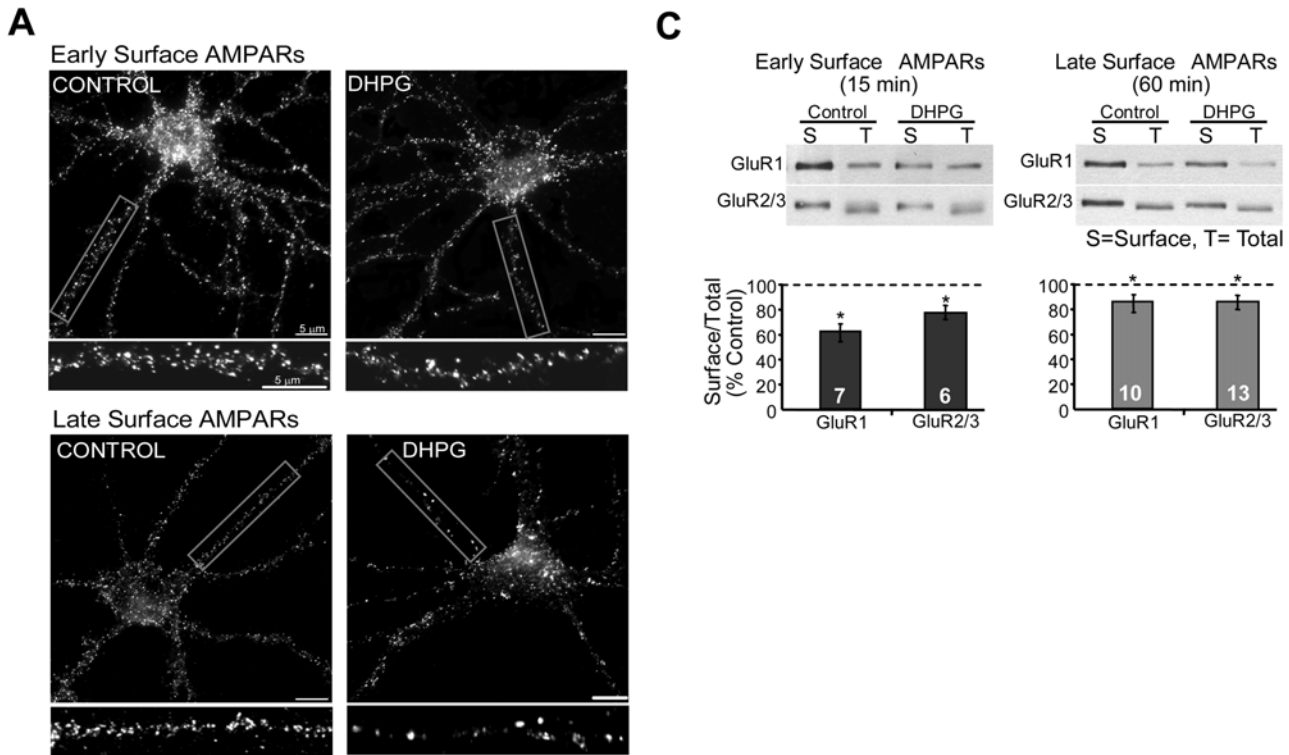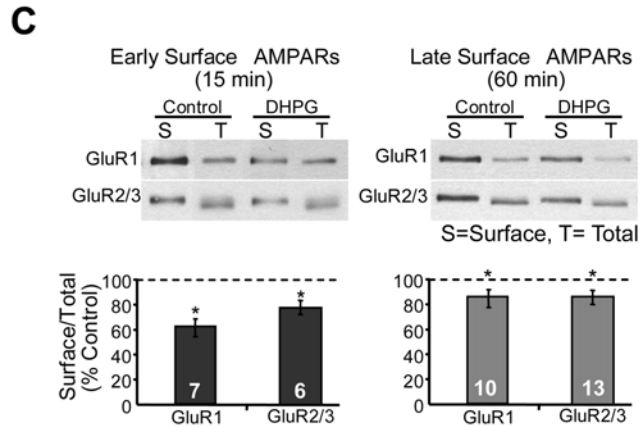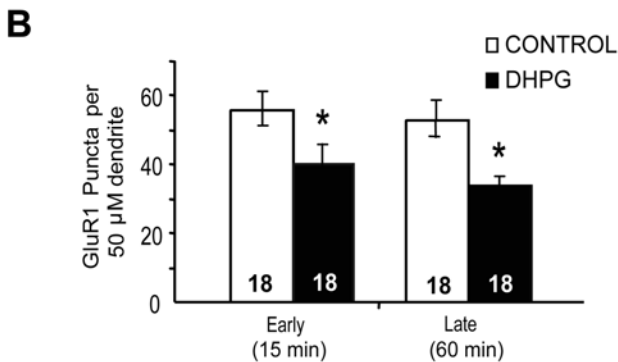

**Supplemental Figure 1. Brief mGluR activation induces an early and persistent decrease in surface GluR1 and GluR2/3 expression.** **A**, Representative images of surface GluR1 staining in low-density dissociated hippocampal neurons 15 min (early) or 1 hour (late) after treatment with media or DHPG (100 μM; 5 min). Scale bars = 10 μm. **B**, Quantification of surface GluR1 puncta number from group data. N = # cells per condition is on each bar. Data pooled from 3 cultures each. **C**, Representative blots of total (T) and biotinylated surface (S) GluR1 and GluR2/3 subunits from high-density dissociated hippocampal neuron cultures 15 min or one hour after DHPG treatment in media. **D**, Brief DHPG treatment decreases surface GluR1 and GluR2/3 subunits relative to untreated cultures, as measured by western blot following biotinylation of surface receptors. N = # cultures per condition is on each bar. \* p < 0.05.

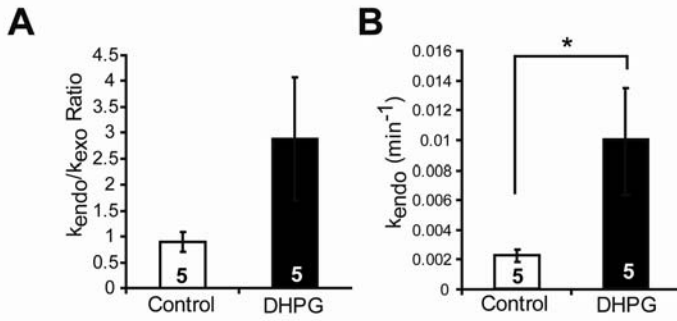

**Supplemental Figure 2. DHPG results in a persistent increase in endocytosis rate constant ( $k_{endo}$ )** **A**, The ratio of endocytosis/exocytosis rate constants ( $k_{endo} / k_{exo}$ ) for GluR1 was calculated from steady-state measurements of surface and total GluR1 in high-density cultures one hour after brief DHPG treatment (shown in Figure 1A-D) based on the following simplified model. The AMPA receptor pools can be described as follows:

$$R_T = R_S + R_I \quad \text{Eq. 1,}$$

where  $R_T$  is the total number of receptors,  $R_S$  is the number of receptors at the surface, and  $R_I$  is the number of internal receptors. In a simplified model, the entire pool of  $R_S$  is available for endocytosis, and the entire pool of  $R_I$  is available for exocytosis and  $R_T$  does not change. The latter is supported by empirical evidence that total GluR1 levels are not different between control and DHPG treated cultures (DHPG total GluR1 levels =  $107 \pm 7\%$  of control;  $n = 17$  cultures;  $p = 0.5$ )

At steady state, the rate of endocytosis equals the rate of exocytosis:

Eq. 2

$$\begin{aligned} k_{endo} \cdot R_S &= k_{exo} \cdot R_I \\ k_{endo} \cdot R_S &= k_{exo} \cdot (R_T - R_S) \\ \frac{k_{endo}}{k_{exo}} &= \frac{R_T - R_S}{R_S} \\ \frac{k_{endo}}{k_{exo}} &= \frac{R_T}{R_S} - 1 \\ 1 + \frac{k_{endo}}{k_{exo}} &= \frac{R_T}{R_S} \\ \frac{R_S}{R_T} &= \frac{1}{1 + \frac{k_{endo}}{k_{exo}}} \end{aligned}$$

Based upon steady state concentrations of receptors at the surface and total receptors, a ratio of the rate constant of endocytosis ( $k_{endo}$ ) to the rate constant of exocytosis ( $k_{exo}$ ) can be determined from Eq. 3.

$$\frac{k_{endo}}{k_{exo}} = \frac{R_T}{R_S} - 1 \quad \text{Eq. 3}$$

**B**, Empirically, the rate constant of endocytosis ( $k_{endo}$ ) can also be determined from pulse chase experiments, where surface receptors are pulsed with a biotin label and chased with media to allow for endocytosis (from Figure 1A,B,D). After stripping of remaining surface biotinylated proteins, internalized receptors (or the change in surface receptors,  $\Delta R_S$ ) can be measured, as long as the change in time ( $\Delta t$ ) is small relative to the percentage of internalized receptors ( $\Delta R_S$ ) to surface receptors ( $R_S$ ).

$$\begin{aligned} \Delta R_S &= R_S \cdot k_{endo} \cdot \Delta t \\ k_{endo} &= \frac{\Delta R_S}{R_S \cdot \Delta t} \end{aligned} \quad \text{Eq. 4}$$

Plotted are calculated values for  $k_{endo}$  based upon measurements of internal accumulation of GluR1 in 5 min, one hour after brief DHPG treatment (from Figure 1A,B,D). N = # cultures per condition is on each bar. \* p < 0.05.

Using the rate constant of endocytosis ( $k_{endo}$ ) obtained from Eq. 4, one can also determine the rate constant of exocytosis ( $k_{exo}$ ) using the ratio obtained from Eq. 3.

$$k_{exo} = \frac{\Delta R_S}{(R_T - R_S) \cdot \Delta t} \quad \text{Eq. 5}$$

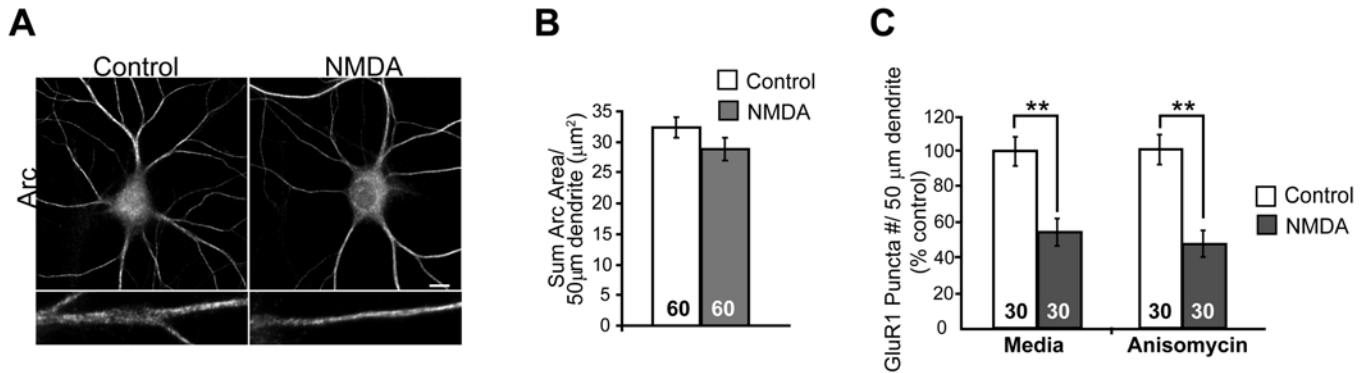

**Supplemental Figure 3. Chemical induction of NMDAR-LTD does not increase Arc protein levels or require protein synthesis.** **A**, Representative Arc immunofluorescence in low-density dissociated hippocampal cultures exposed to control media or NMDA treatment (20  $\mu$ M; 3 min). Neurons were fixed 10 min after treatment onset. Scale bar = 10  $\mu$ m. **B**, Quantification of Arc immunofluorescence from one culture reveal that brief NMDA treatment does not alter Arc-positive staining 10 min after onset of treatment. N = # cells per condition is on each bar. **C**, NMDAR-induced decreases in surface GluR1 do not require new protein synthesis. Dissociated cultured neurons were treated with NMDA (20  $\mu$ M; 3 min) in the presence or absence of the protein synthesis inhibitor anisomycin and surface GluR1 puncta number were quantified one hour after treatment. N = # cells on each bar. Data from 2 cultures. \*\*  $p < 0.01$ .

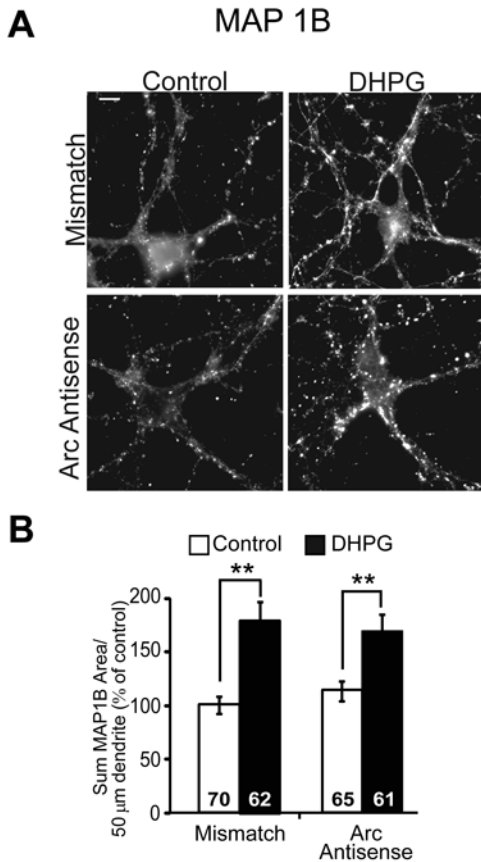

**Supplemental Figure 4. Arc antisense oligonucleotide does not block mGluR-induced increases in dendritic MAP1b protein levels.** **A**, Representative MAP1b immunofluorescence in low-density dissociated hippocampal cultures exposed to control media or DHPG treatment (100  $\mu$ M; 5 min) in the presence of Mismatch control oligo or Arc antisense oligo. Neurons were fixed 10 min after treatment onset. Scale bar = 10  $\mu$ m. **B**, Quantification of MAP1b immunofluorescence reveals that DHPG induces increases in MAP1b protein levels which are unaffected by oligo pretreatment. N = # cells on each bar. Data from 4 cultures. \*\* p < 0.01.

| Treatment                   | Media   |              | + Anisomycin |      | Media   |              |
|-----------------------------|---------|--------------|--------------|------|---------|--------------|
|                             | Control | DHPG         | Control      | DHPG | Control | NMDA         |
| <b>Surface/Total GluR1</b>  | 6.51    | 4.05         | 5.87         | 6.17 | 2.25    | 1.62         |
| SEM                         | 0.69    | 0.53         | 1.18         | 1.17 | 0.47    | 0.55         |
| N                           | 5       | 5            | 5            | 5    | 6       | 6            |
| p value                     |         | <b>0.02*</b> |              | 0.86 |         | <b>0.01*</b> |
| <b>Internal/Total GluR1</b> | 0.06    | 0.17         | 0.07         | 0.06 | 0.26    | 0.18         |
| SEM                         | 0.01    | 0.03         | 0.01         | 0.01 | 0.06    | 0.04         |
| N                           | 5       | 5            | 5            | 5    | 6       | 6            |
| P value                     |         | <b>0.04*</b> |              | 0.39 |         | 0.10         |

**Supplemental Table 1: Raw ratios of surface/total GluR1 and internal/total GluR1 from biotinylation experiments presented in Figure 1B-D.** n = number of cultures. P values from a paired t-test comparing ratio values in treated (DHPG or NMDA) cultures to their respective, sister control (untreated) cultures.
